# Supplementary material for: Survey of commercial Rhodiola products revealed species diversity and potential safety issues
Source: PubMed Central journal article supplement (PMC4321177; doi:10.1038/srep08337), 2015-02-09
Supplement: srep08337-s1.pdf [file srep08337-s1.pdf]

## **Survey of commercial *Rhodiola* products revealed species diversity and potential safety issues**

Tianyi Xin<sup>1\*</sup>, Xiaojin Li<sup>2\*</sup>, Hui Yao<sup>1</sup>, Yulin Lin<sup>1</sup>, Xiaochong Ma<sup>1</sup>, Ruiyang Cheng<sup>3</sup>, Jingyuan Song<sup>1,4</sup>, Lianghong Ni<sup>5</sup>, Congzhao Fan<sup>2</sup> & Shilin Chen<sup>1,3</sup>

1. Institute of Medicinal Plant Development, Chinese Academy of Medical Sciences & Peking Union Medical College, Beijing 100193, P.R. China
2. Xinjiang Institute of Chinese Materia Medica and Ethnical Materia, Urumqi 830002, P.R. China
3. Institute of Chinese Materia Medica, China Academy of Chinese Medical Sciences, Beijing 100700, P.R. China
4. Chongqing Institute of Medicinal Plant Cultivation, Chongqing 408435, P.R. China
5. Shanghai University of Traditional Chinese Medicine, Shanghai 201203, P.R. China

\* These authors contributed equally to this work.

\*\*Corresponding author

Jingyuan Song, Professor

Address: No.151, Malianwa North Road, HaiDian District, Beijing 100193, P.R. China

Tel.: +86-10-57833199

Fax: +86-10-62811448

E-mail address: [songjingyuan@hotmail.com](mailto:songjingyuan@hotmail.com)

Shilin Chen, Professor

Address: No. 16 Nanxiaojie, Dongzhimennei Ave, Beijing, 100700, P.R. China

Tel.: +86-10-84017374

E-mail address: [slchen@implad.ac.cn](mailto:slchen@implad.ac.cn)

**Comparison among four DNA barcodes.** We compared the divergence of ITS2, *psbA-trnH*, *rbcL*, and *matK* regions. For each of the ten species, one to five samples were selected for a supplementary test (Table S4). The results indicated the following:

(1) PCR amplification is highly successful for the ITS2 and *psbA-trnH* regions, whereas the *rbcL* and *matK* regions were not amplified in approximately one-third and one-fourth of the samples, respectively.

(2) All the PCR products of the ITS2, *psbA-trnH*, and *rbcL* regions could be bi-directional sequenced and assembled successfully, whereas only the reverse sequencing results could be obtained for the *matK* region because of the poly T region (with approximately 11 thymines).

(3) All the ITS2, *psbA-trnH*, *rbcL*, and *matK* sequences obtained in the experiment were aligned (Figure S1, S3-S5). Given that five species had no variability in the *rbcL* region (Figure S3) and the *matK* sequences of some samples could not be obtained in the experiment, these two markers (*rbcL* and *matK*) were deemed unsuitable for the identification of the ten *Rhodiola* species in this study. The *psbA-trnH* region could identify these species by BLAST1 analysis. Furthermore, ITS2 showed enough interspecies divergence to differentiate these species (main text page 5, line 25-28). The results demonstrated that the ITS2 barcode was able to accurately and swiftly distinguish the ten species.

(4) These results confirmed that the ITS2 and *psbA-trnH* regions were acceptably capable of species identification. These conclusions are consistent with those in our previous study<sup>25</sup>. Given that the use of one marker could solve the identification problem and minimize the cost in the experiment, we finally chose ITS2 as the DNA barcode in this study.

**Table S1 List of specimens and authentic samples from the 10 *Rhodiola* species**

| Latin Name                    | Voucher No. | Haplotype | GenBank No. | DNA concentration (ng/ $\mu$ L) | OD260/280 | Location                |
|-------------------------------|-------------|-----------|-------------|---------------------------------|-----------|-------------------------|
| <i>Rhodiola rosea</i>         | PS1750MT11  | RR1       | KJ796865    | —                               | —         | Qitai, Xinjiang         |
| <i>Rhodiola rosea</i>         | PS1750MT12  | RR1       |             | —                               | —         | Jiminay, Xinjiang       |
| <i>Rhodiola rosea</i>         | PS1750MT13  | RR1       |             | —                               | —         | Xinjiang                |
| <i>Rhodiola algida</i>        | PS1901MT01  | RA1       | KJ796854    | 371.6                           | 1.97      | Burqin, Xinjiang        |
| <i>Rhodiola fastigiata</i>    | PS1902MT01  | RF1       | KJ796857    | 32.1                            | 1.59      | Segrila Mountain, Tibet |
| <i>Rhodiola fastigiata</i>    | PS1902MT02  | RF2       | KJ796858    | 46.7                            | 1.47      | Segrila Mountain, Tibet |
| <i>Rhodiola fastigiata</i>    | PS1902MT03  | RF2       |             | 20.8                            | 1.68      | Segrila Mountain, Tibet |
| <i>Rhodiola fastigiata</i>    | PS1902MT04  | RF2       |             | 53.2                            | 1.46      | Segrila Mountain, Tibet |
| <i>Rhodiola gelida</i>        | PS1903MT01  | RG1       | KJ796859    | 19.7                            | 1.16      | Keriya, Xinjiang        |
| <i>Rhodiola gelida</i>        | PS1903MT02  | RG2       | KJ796860    | —                               | —         | Kuenes, Xinjiang        |
| <i>Rhodiola kirilowii</i>     | PS1904MT01  | RK1       | KJ796861    | 209.4                           | 1.84      | Urumchi, Xinjiang       |
| <i>Rhodiola kirilowii</i>     | PS1904MT02  | RK1       |             | —                               | —         | Hejing, Xinjiang        |
| <i>Rhodiola kirilowii</i>     | PS1904MT03  | RK1       |             | —                               | —         | Hejing, Xinjiang        |
| <i>Rhodiola kirilowii</i>     | PS1904MT04  | RK1       |             | —                               | —         | Zhaosu, Xinjiang        |
| <i>Rhodiola kirilowii</i>     | PS1904MT05  | RK1       |             | —                               | —         | Zhaosu, Xinjiang        |
| <i>Rhodiola kirilowii</i>     | PS1904MT06  | RK1       |             | —                               | —         | Xinjiang                |
| <i>Rhodiola pamiro-alaica</i> | PS1905MT01  | RP1       | KJ796862    | —                               | —         | Xinjiang                |
| <i>Rhodiola pamiro-alaica</i> | PS1905MT02  | RP1       |             | —                               | —         | Xinjiang                |
| <i>Rhodiola quadrifida</i>    | PS1906MT01  | RQ1       | KJ796863    | 92.3                            | 1.35      | Miquan, Xinjiang        |

|                            |            |      |          |       |      |                         |
|----------------------------|------------|------|----------|-------|------|-------------------------|
| <i>Rhodiola quadrifida</i> | PS1906MT02 | RQ1  |          | 97.1  | 1.71 | Fukang, Xinjiang        |
| <i>Rhodiola quadrifida</i> | PS1906MT03 | RQ1  |          | 88.5  | 1.38 | Fukang, Xinjiang        |
| <i>Rhodiola quadrifida</i> | PS1906MT04 | RQ2  | KJ796864 | 27.0  | 1.48 | Burqin, Xinjiang        |
| <i>Rhodiola quadrifida</i> | PS1906MT05 | RQ1  |          | 296.4 | 1.38 | Jimsar, Xinjiang        |
| <i>Rhodiola quadrifida</i> | PS1906MT06 | RQ1  |          | 357.0 | 2.02 | Jimsar, Xinjiang        |
| <i>Rhodiola quadrifida</i> | PS1906MT07 | RQ3  |          | —     | —    | Qitai, Xinjiang         |
| <i>Rhodiola quadrifida</i> | PS1906MT08 | RQ2  |          | —     | —    | Jiminay, Xinjiang       |
| <i>Rhodiola sacra</i>      | PS1907MT01 | RS1  | KJ796866 | 46.7  | 1.18 | Lhasa, Tibet            |
| <i>Rhodiola sacra</i>      | PS1907MT02 | RS1  |          | 17.1  | 1.03 | Lhasa, Tibet            |
| <i>Rhodiola serrata</i>    | PS1908MT01 | RSE1 | KJ796867 | 123.5 | 1.68 | Beijing                 |
| <i>Rhodiola crenulata</i>  | PS0576MT01 | RC2  | GQ434463 | —     | —    | Wenchuan, Sichuan       |
| <i>Rhodiola crenulata</i>  | PS0576MT11 | RC2  |          | 11.6  | 1.16 | Segrila Mountain, Tibet |
| <i>Rhodiola crenulata</i>  | PS0576MT12 | RC2  |          | 42.6  | 1.08 | Segrila Mountain, Tibet |
| <i>Rhodiola crenulata</i>  | YC0141MT01 | RC1  | KJ796855 | 62.7  | 2.18 | Naidong, Tibet          |
| <i>Rhodiola crenulata</i>  | YC0141MT02 | RC2  |          | 228.1 | 1.57 | Naidong, Tibet          |
| <i>Rhodiola crenulata</i>  | YC0141MT03 | RC2  |          | 40.9  | 1.28 | Naidong, Tibet          |
| <i>Rhodiola crenulata</i>  | YC0141MT04 | RC2  |          | 56.9  | 1.68 | Naidong, Tibet          |
| <i>Rhodiola crenulata</i>  | YC0141MT05 | RC2  |          | 56.4  | 1.81 | Naidong, Tibet          |
| <i>Rhodiola crenulata</i>  | YC0141MT06 | RC1  |          | 9.6   | 1.54 | Naidong, Tibet          |
| <i>Rhodiola crenulata</i>  | YC0141MT07 | RC2  |          | 106.6 | 2.18 | Naidong, Tibet          |
| <i>Rhodiola crenulata</i>  | YC0141MT08 | RC2  |          | 84.5  | 1.87 | Naidong, Tibet          |

|                           |            |     |          |       |      |                |
|---------------------------|------------|-----|----------|-------|------|----------------|
| <i>Rhodiola crenulata</i> | YC0141MT09 | RC2 |          | 49.8  | 1.32 | Naidong, Tibet |
| <i>Rhodiola crenulata</i> | YC0141MT10 | RC1 |          | 130.8 | 1.68 | Naidong, Tibet |
| <i>Rhodiola crenulata</i> | YC0141MT11 | RC1 |          | 53.6  | 4.05 | Sangri, Tibet  |
| <i>Rhodiola crenulata</i> | YC0141MT12 | RC3 | KJ796856 | 27.4  | 1.85 | Sangri, Tibet  |
| <i>Rhodiola crenulata</i> | YC0141MT13 | RC2 |          | 51.1  | 2.98 | Sangri, Tibet  |
| <i>Rhodiola crenulata</i> | YC0141MT14 | RC2 |          | 116.9 | 1.65 | Sangri, Tibet  |
| <i>Rhodiola crenulata</i> | YC0141MT15 | RC1 |          | 63.4  | 2.53 | Sangri, Tibet  |
| <i>Rhodiola crenulata</i> | YC0141MT16 | RC1 |          | 16.8  | 1.53 | Sangri, Tibet  |
| <i>Rhodiola crenulata</i> | YC0141MT17 | RC1 |          | 43.8  | 2.10 | Sangri, Tibet  |
| <i>Rhodiola crenulata</i> | YC0141MT18 | RC1 |          | 72.1  | 5.06 | Sangri, Tibet  |
| <i>Rhodiola crenulata</i> | YC0141MT19 | RC2 |          | 25.6  | 1.52 | Sangri, Tibet  |
| <i>Rhodiola crenulata</i> | YC0141MT20 | RC3 |          | 24.3  | 1.17 | Sangri, Tibet  |
| <i>Rhodiola crenulata</i> | YC0141MT21 | RC1 |          | 62.4  | 4.44 | Linzhou, Tibet |
| <i>Rhodiola crenulata</i> | YC0141MT22 | RC1 |          | 57.7  | 1.87 | Linzhou, Tibet |
| <i>Rhodiola crenulata</i> | YC0141MT23 | RC2 |          | 191.0 | 1.80 | Linzhou, Tibet |
| <i>Rhodiola crenulata</i> | YC0141MT24 | RC1 |          | 134.1 | 2.28 | Linzhou, Tibet |
| <i>Rhodiola crenulata</i> | YC0141MT25 | RC1 |          | 2.6   | 2.26 | Linzhou, Tibet |
| <i>Rhodiola crenulata</i> | YC0141MT26 | RC1 |          | 15.2  | 2.40 | Linzhou, Tibet |
| <i>Rhodiola crenulata</i> | YC0141MT27 | RC1 |          | 33.1  | 1.69 | Linzhou, Tibet |
| <i>Rhodiola crenulata</i> | YC0141MT28 | RC1 |          | 175.6 | 2.23 | Linzhou, Tibet |
| <i>Rhodiola crenulata</i> | YC0141MT29 | RC1 |          | 69.3  | 2.73 | Linzhou, Tibet |

|                           |            |     |       |      |                  |
|---------------------------|------------|-----|-------|------|------------------|
| <i>Rhodiola crenulata</i> | YC0141MT30 | RC1 | 33.3  | 2.26 | Linzhou, Tibet   |
| <i>Rhodiola crenulata</i> | YC0141MT31 | RC1 | 40.1  | 1.63 | Linzhou, Tibet   |
| <i>Rhodiola crenulata</i> | YC0141MT32 | RC1 | 43.7  | 3.80 | Linzhou, Tibet   |
| <i>Rhodiola crenulata</i> | YC0141MT33 | RC3 | 53.1  | 1.78 | Linzhou, Tibet   |
| <i>Rhodiola crenulata</i> | YC0141MT34 | RC1 | 45.7  | 1.52 | Qushui, Tibet    |
| <i>Rhodiola crenulata</i> | YC0141MT35 | RC1 | 149.7 | 2.50 | Qushui, Tibet    |
| <i>Rhodiola crenulata</i> | YC0141MT36 | RC2 | 57.8  | 1.49 | Qushui, Tibet    |
| <i>Rhodiola crenulata</i> | YC0141MT37 | RC1 | 64.0  | 1.52 | Qushui, Tibet    |
| <i>Rhodiola crenulata</i> | YC0141MT38 | RC2 | 90.2  | 1.56 | Qushui, Tibet    |
| <i>Rhodiola crenulata</i> | YC0141MT39 | RC1 | 6.1   | 2.02 | Qushui, Tibet    |
| <i>Rhodiola crenulata</i> | YC0141MT40 | RC1 | 102.2 | 2.05 | Qushui, Tibet    |
| <i>Rhodiola crenulata</i> | YC0141MT41 | RC1 | 161.6 | 2.05 | Qushui, Tibet    |
| <i>Rhodiola crenulata</i> | YC0141MT42 | RC2 | 11.6  | 0.90 | Qushui, Tibet    |
| <i>Rhodiola crenulata</i> | YC0141MT43 | RC2 | 866.4 | 0.89 | Qushui, Tibet    |
| <i>Rhodiola crenulata</i> | YC0141MT44 | RC1 | 6.9   | 1.23 | Qushui, Tibet    |
| <i>Rhodiola crenulata</i> | YC0141MT45 | RC2 | 207.5 | 1.26 | Chengdu, Sichuan |
| <i>Rhodiola crenulata</i> | YC0141MT46 | RC2 | 5.3   | 1.07 | Chengdu, Sichuan |
| <i>Rhodiola crenulata</i> | YC0141MT47 | RC1 | 83.3  | 1.63 | Chengdu, Sichuan |
| <i>Rhodiola crenulata</i> | YC0141MT48 | RC2 | 50.3  | 1.86 | Chengdu, Sichuan |
| <i>Rhodiola crenulata</i> | YC0141MT49 | RC2 | 3.2   | 0.99 | Chengdu, Sichuan |
| <i>Rhodiola crenulata</i> | YC0141MT50 | RC2 | 4.9   | 1.04 | Chengdu, Sichuan |

**Table S2 Commercial decoction piece samples sold as *Rhodiolae Crenulatae Radix et Rhizoma* from different provinces in China**

| <b>Sample No.</b> | <b>Best hit</b>            | <b>Purchased Place</b> | <b>Sample No.</b> | <b>Best hit</b>           | <b>Purchased Place</b> |
|-------------------|----------------------------|------------------------|-------------------|---------------------------|------------------------|
| HYP01             | <i>Rhodiola crenulata</i>  | Beijing                | HYP21             | <i>Rhodiola rosea</i>     | Wuhan, Hubei           |
| HYP02             | <i>Rhodiola serrata</i>    | Beijing                | HYP22             | <i>Rhodiola crenulata</i> | Wuhan, Hubei           |
| HYP03             | <i>Rhodiola crenulata</i>  | Beijing                | HYP23             | <i>Rhodiola crenulata</i> | Changsha, Hunan        |
| HYP04             | <i>Rhodiola serrata</i>    | Beijing                | HYP24             | <i>Rhodiola gelida</i>    | Changsha, Hunan        |
| HYP05             | <i>Rhodiola quadrifida</i> | Xushui, Hebei          | HYP25             | <i>Rhodiola gelida</i>    | Changsha, Hunan        |
| HYP06             | <i>Rhodiola fastigiata</i> | Baoding, Hebei         | HYP26             | <i>Rhodiola gelida</i>    | Guangzhou, Guangdong   |
| HYP07             | <i>Rhodiola serrata</i>    | Baoding, Hebei         | HYP27             | <i>Rhodiola serrata</i>   | Guangzhou, Guangdong   |
| HYP08             | <i>Rhodiola serrata</i>    | Chengdu, Sichuan       | HYP28             | <i>Rhodiola crenulata</i> | Guangzhou, Guangdong   |
| HYP09             | <i>Rhodiola crenulata</i>  | Chengdu, Sichuan       | HYP29             | <i>Rhodiola serrata</i>   | Guangzhou, Guangdong   |
| HYP10             | <i>Rhodiola crenulata</i>  | Chengdu, Sichuan       | HYP30             | <i>Rhodiola gelida</i>    | Sanya, Hainan          |
| HYP11             | <i>Rhodiola crenulata</i>  | Chengdu, Sichuan       | HYP31             | <i>Rhodiola serrata</i>   | Sanya, Hainan          |
| HYP12             | <i>Rhodiola crenulata</i>  | Chengdu, Sichuan       | HYP32             | <i>Rhodiola crenulata</i> | Sanya, Hainan          |
| HYP13             | <i>Rhodiola crenulata</i>  | Tianjin                | HYP33             | <i>Rhodiola crenulata</i> | Sanya, Hainan          |
| HYP14             | <i>Rhodiola crenulata</i>  | Xichang, Sichuan       | HYP34             | <i>Rhodiola crenulata</i> | Kunming, Yunnan        |
| HYP15             | <i>Rhodiola crenulata</i>  | Urumchi, Xinjiang      | HYP35             | <i>Rhodiola serrata</i>   | Kunming, Yunnan        |
| HYP16             | <i>Rhodiola rosea</i>      | Urumchi, Xinjiang      | HYP36             | <i>Rhodiola serrata</i>   | Kunming, Yunnan        |
| HYP17             | <i>Rhodiola serrata</i>    | Urumchi, Xinjiang      | HYP37             | <i>Rhodiola crenulata</i> | Kunming, Yunnan        |
| HYP18             | <i>Rhodiola crenulata</i>  | Wuhan, Hubei           | HYP38             | <i>Rhodiola gelida</i>    | Hefei, Anhui           |
| HYP19             | <i>Rhodiola crenulata</i>  | Beijing                | HYP39             | <i>Rhodiola serrata</i>   | Hefei, Anhui           |
| HYP20             | <i>Rhodiola crenulata</i>  | Wuhan, Hubei           | HYP40             | <i>Rhodiola rosea</i>     | Hefei, Anhui           |

|       |                            |                    |       |                           |                    |
|-------|----------------------------|--------------------|-------|---------------------------|--------------------|
| HYP41 | <i>Rhodiola serrata</i>    | Guiyang, Guizhou   | HYP62 | <i>Rhodiola crenulata</i> | Hangzhou, Zhejiang |
| HYP42 | <i>Rhodiola serrata</i>    | Guiyang, Guizhou   | HYP63 | <i>Rhodiola rosea</i>     | Shanghai           |
| HYP43 | <i>Rhodiola crenulata</i>  | Guiyang, Guizhou   | HYP64 | <i>Rhodiola serrata</i>   | Shanghai           |
| HYP44 | <i>Rhodiola serrata</i>    | Taiyuan, Shanxi    | HYP65 | —                         | Shanghai           |
| HYP45 | <i>Rhodiola serrata</i>    | Taiyuan, Shanxi    | HYP66 | —                         | Shanghai           |
| HYP46 | <i>Rhodiola serrata</i>    | Taiyuan, Shanxi    | HYP67 | —                         | Changchun, Jilin   |
| HYP47 | <i>Rhodiola serrata</i>    | Xiaoyi, Shaanxi    | HYP68 | <i>Rhodiola serrata</i>   | Changchun, Jilin   |
| HYP48 | <i>Rhodiola serrata</i>    | Xiaoyi, Shaanxi    | HYP69 | <i>Rhodiola rosea</i>     | Changchun, Jilin   |
| HYP49 | <i>Rhodiola serrata</i>    | Xiaoyi, Shaanxi    | HYP70 | <i>Rhodiola serrata</i>   | Yinchuan, Ningxia  |
| HYP50 | <i>Rhodiola rosea</i>      | Huaian, Jiangsu    | HYP71 | <i>Rhodiola serrata</i>   | Yinchuan, Ningxia  |
| HYP51 | <i>Rhodiola quadrifida</i> | Huaian, Jiangsu    | HYP72 | <i>Rhodiola gelida</i>    | Yinchuan, Ningxia  |
| HYP52 | <i>Rhodiola serrata</i>    | Huaian, Jiangsu    | HYP73 | <i>Rhodiola serrata</i>   | Yinchuan, Ningxia  |
| HYP53 | <i>Rhodiola serrata</i>    | Xiamen, Fujian     | HYP74 | <i>Rhodiola crenulata</i> | Luoyang, Henan     |
| HYP54 | <i>Rhodiola crenulata</i>  | Xiamen, Fujian     | HYP75 | <i>Rhodiola rosea</i>     | Luoyang, Henan     |
| HYP55 | <i>Rhodiola crenulata</i>  | Xiamen, Fujian     | HYP76 | <i>Rhodiola serrata</i>   | Luoyang, Henan     |
| HYP56 | <i>Rhodiola crenulata</i>  | Chongqing          | HYP77 | <i>Rhodiola crenulata</i> | Xining, Qinghai    |
| HYP57 | <i>Rhodiola crenulata</i>  | Chongqing          | HYP78 | —                         | Xining, Qinghai    |
| HYP58 | <i>Rhodiola crenulata</i>  | Chongqing          | HYP79 | <i>Rhodiola serrata</i>   | Xining, Qinghai    |
| HYP59 | —                          | Hangzhou, Zhejiang | HYP80 | <i>Rhodiola crenulata</i> | Guilin, Guangxi    |
| HYP60 | —                          | Hangzhou, Zhejiang | HYP81 | <i>Rhodiola gelida</i>    | Guilin, Guangxi    |
| HYP61 | <i>Rhodiola serrata</i>    | Hangzhou, Zhejiang | HYP82 | <i>Rhodiola crenulata</i> | Guilin, Guangxi    |



|       |                           |                   |       |                           |                      |
|-------|---------------------------|-------------------|-------|---------------------------|----------------------|
| HYP83 | <i>Rhodiola crenulata</i> | Guilin, Guangxi   | HYP92 | —                         | Nanchang, Jiangxi    |
| HYP84 | <i>Rhodiola serrata</i>   | Qingdao, Shandong | HYP93 | <i>Rhodiola crenulata</i> | Shenyang, Liaoning   |
| HYP85 | <i>Rhodiola rosea</i>     | Qingdao, Shandong | HYP94 | <i>Rhodiola crenulata</i> | Shenyang, Liaoning   |
| HYP86 | <i>Rhodiola serrata</i>   | Qingdao, Shandong | HYP95 | <i>Rhodiola crenulata</i> | Shenyang, Liaoning   |
| HYP87 | —                         | Taipei, Taiwan    | HYP96 | —                         | Harbin, Heilongjiang |
| HYP88 | —                         | Taipei, Taiwan    | HYP97 | <i>Rhodiola rosea</i>     | Urumchi, Xinjiang    |
| HYP89 | <i>Rhodiola serrata</i>   | Taipei, Taiwan    | HYP98 | <i>Rhodiola serrata</i>   | Kunming, Yunnan      |
| HYP90 | <i>Rhodiola crenulata</i> | Shangrao, Jiangxi | HYP99 | <i>Rhodiola crenulata</i> | Chengdu, Sichuan     |
| HYP91 | <i>Rhodiola serrata</i>   | Nanchang, Jiangxi | HDP01 | <i>Rhodiola serrata</i>   | Xichang, Sichuan     |

Symbol “—” indicated the sample did not get ideal DNA barcode sequence

**Table S3 List of *Rhodiola* species that contain cyanogenic glycosides**

| <b>Latin name</b>                                            |                                                                                                                                                                                                                                                                                                                                                                                                                                            |
|--------------------------------------------------------------|--------------------------------------------------------------------------------------------------------------------------------------------------------------------------------------------------------------------------------------------------------------------------------------------------------------------------------------------------------------------------------------------------------------------------------------------|
| <b><i>Rhodiola</i> species contain cyanogenic glycosides</b> | <i>Rhodiola rosea</i> L.; <i>R. gelida</i> Schrenk; <i>R. quadrifida</i> (Pall.) Fisch. et Mey.; <i>R. concinna</i> (Praeg.) S. H. Fu; <i>R. kirilowii</i> (Regel) Maxim.; <i>R. junggarica</i> C. Y. Yang et N. R. Cui; <i>R. linearifolia</i> A. Bor.; <i>R. litwinowii</i> A. Bor.; <i>R. pamiro-alaica</i> A. Bor.; <i>R. heterodonta</i> (Hook. f. et Thoms.) A. Bor.; <i>R. bupleuroides</i> (Wall. ex Hook. f. et Thoms.) S. H. Fu; |

**Table S4 Sequence recovery of the four barcodes in the 10 *Rhodiola* species**

| <b>Voucher No.</b> | <b>Latin name</b>             | <b>ITS2</b> | <b><i>psbA-trnH</i></b> | <b><i>matK</i></b> | <b><i>rbcL</i></b> |
|--------------------|-------------------------------|-------------|-------------------------|--------------------|--------------------|
| PS1901MT01         | <i>Rhodiola algida</i>        | ✓           | ✓                       | ✓                  | ✓                  |
| PS0576MT11         | <i>Rhodiola crenulata</i>     | ✓           | ✓                       | —                  | —                  |
| YC0141MT08         | <i>Rhodiola crenulata</i>     | ✓           | ✓                       | ✓                  | ✓                  |
| YC0141MT09         | <i>Rhodiola crenulata</i>     | ✓           | ✓                       | —                  | ✓                  |
| PS1902MT01         | <i>Rhodiola fastigiata</i>    | ✓           | ✓                       | —                  | —                  |
| PS1902MT02         | <i>Rhodiola fastigiata</i>    | ✓           | ✓                       | —                  | —                  |
| PS1902MT03         | <i>Rhodiola fastigiata</i>    | ✓           | ✓                       | —                  | —                  |
| PS1902MT04         | <i>Rhodiola fastigiata</i>    | ✓           | ✓                       | —                  | —                  |
| PS1903MT02         | <i>Rhodiola gelida</i>        | ✓           | ✓                       | ✓                  | ✓                  |
| PS1904MT02         | <i>Rhodiola kirilowii</i>     | ✓           | ✓                       | ✓                  | ✓                  |
| PS1904MT03         | <i>Rhodiola kirilowii</i>     | ✓           | ✓                       | ✓                  | ✓                  |
| PS1904MT04         | <i>Rhodiola kirilowii</i>     | ✓           | ✓                       | ✓                  | ✓                  |
| PS1904MT05         | <i>Rhodiola kirilowii</i>     | ✓           | ✓                       | ✓                  | ✓                  |
| PS1904MT06         | <i>Rhodiola kirilowii</i>     | ✓           | ✓                       | ✓                  | ✓                  |
| PS1905MT01         | <i>Rhodiola pamiro-alaica</i> | ✓           | ✓                       | ✓                  | ✓                  |
| PS1905MT02         | <i>Rhodiola pamiro-alaica</i> | ✓           | ✓                       | —                  | ✓                  |
| PS1906MT01         | <i>Rhodiola quadrifida</i>    | ✓           | ✓                       | ✓                  | ✓                  |
| PS1906MT04         | <i>Rhodiola quadrifida</i>    | ✓           | ✓                       | ✓                  | ✓                  |
| PS1906MT07         | <i>Rhodiola quadrifida</i>    | ✓           | ✓                       | ✓                  | ✓                  |
| PS1750MT11         | <i>Rhodiola rosea</i>         | ✓           | ✓                       | ✓                  | ✓                  |
| PS1750MT12         | <i>Rhodiola rosea</i>         | ✓           | ✓                       | ✓                  | ✓                  |
| PS1750MT13         | <i>Rhodiola rosea</i>         | ✓           | ✓                       | ✓                  | ✓                  |
| PS1907MT01         | <i>Rhodiola sacra</i>         | ✓           | ✓                       | ✓                  | ✓                  |
| PS1907MT02         | <i>Rhodiola sacra</i>         | ✓           | ✓                       | ✓                  | ✓                  |
| PS1908MT01         | <i>Rhodiola serrata</i>       | ✓           | ✓                       | —                  | —                  |

Symbol “✓” refers to the samples with the relevant barcode sequence

Symbol “—” refers to the samples which do not have the relevant barcode sequence

```

11111111 1111111111 22222
12333568 9900122335 5556677899 00112
2628248174 7919468490 5690113746 09195
Rhodiola crenulata PS0576MT01 GCGGTGTCCC GTACCAGCCT GCCGCCCTCC CCTCT
Rhodiola algida PS1901MT01 .T.C..... .....T. .TT..... .TC..
Rhodiola fastigiata PS1902MT01 AT.....A.. T...TGAATG .T..... GGC.C
Rhodiola fastigiata PS1902MT02 AT.....A.. T...TGAATG .T..... G.C..
Rhodiola gelida PS1903MT02 .....T. ....T. ....
Rhodiola gelida PS1903MT01 .....T. ....A. ....
Rhodiola kirilowii PS1904MT02 .T..... .T.G..TG AT..T..... .C..
Rhodiola pamiroalaica PS1905MT01 AT.....A.. T...T.A.TG .T..... G.C..
Rhodiola quadrifida PS1906MT07 .T..... .Y.G..TG .T..T..... .CT.
Rhodiola quadrifida PS1906MT08 .TA..... .G..TG .T..T...T..C..
Rhodiola quadrifida PS1906MT01 .T..... .G..TG .T..T..... .CT.
Rhodiola rosea PS1750MT01 AT.....A.. T...T.A.TG .T..... G.C..
Rhodiola sacra PS1907MT01 .T..CAC..G..TT...T. .T.CTTGA...C..
Rhodiola serrata PS1908MT01 ..... .C..TGA.TG .....

```

**Figure S1** Variable sites in the ITS2 sequence of the 10 *Rhodiola* species

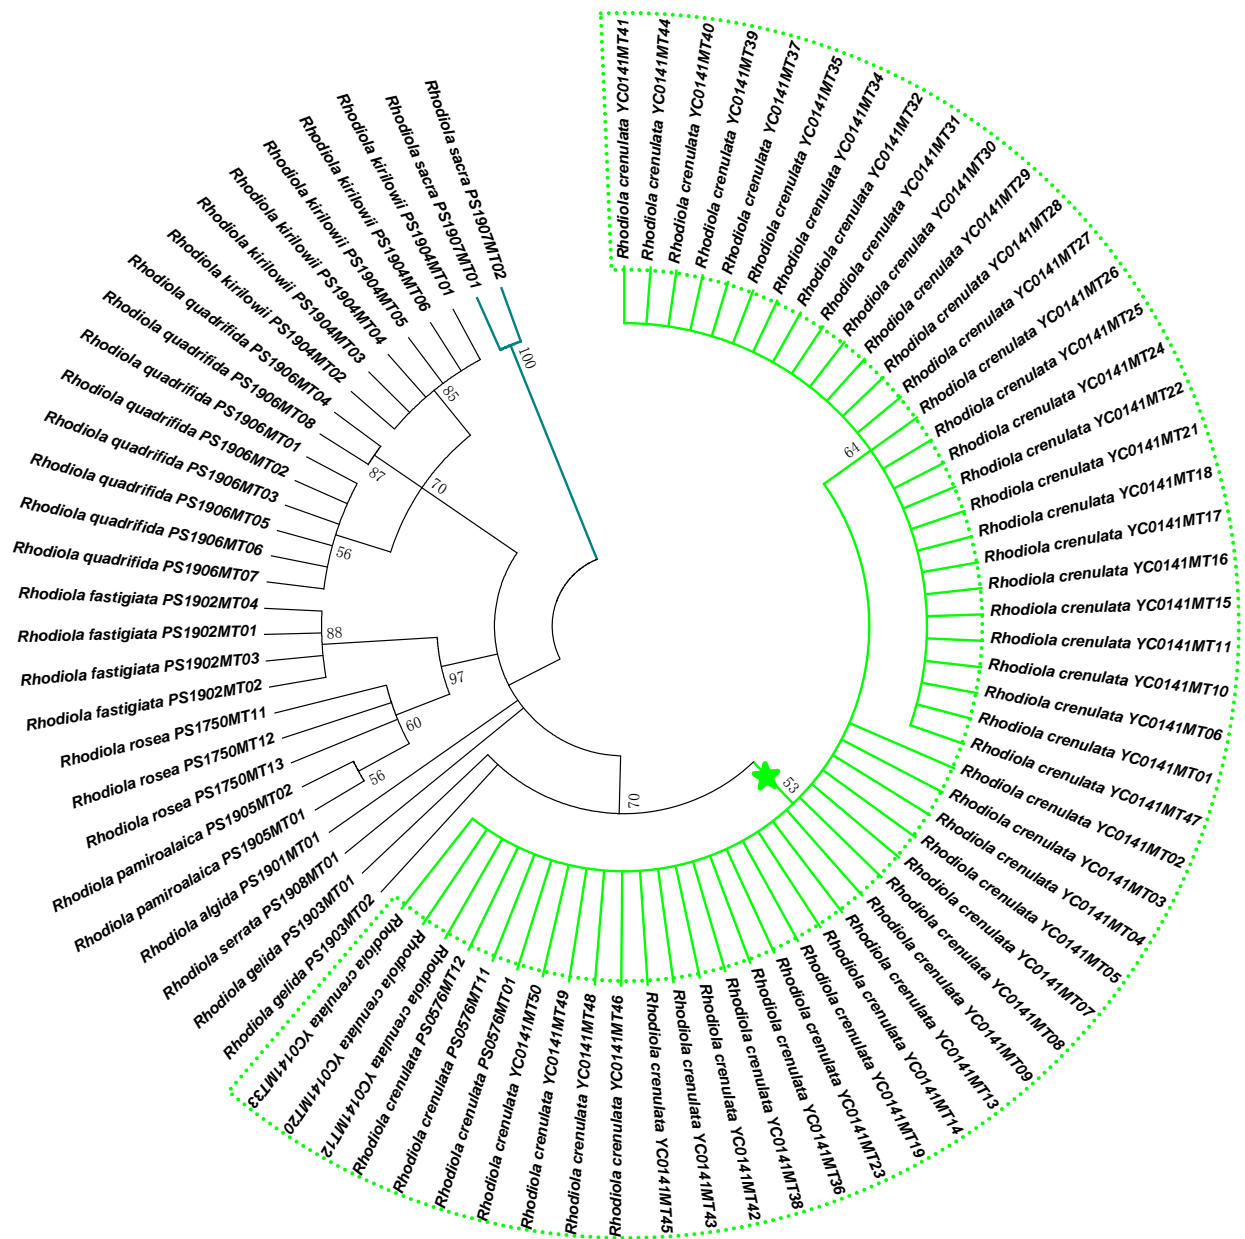

Figure S2 NJ tree of *Rhodiola crenulata* and its closely related species constructed using the ITS2 sequences. The bootstrap scores (1 000 replicates) are shown ( $\geq 50\%$ ) for each branch. Symbol ★ showed the clade of *R. crenulata*

|                               |            |       |
|-------------------------------|------------|-------|
|                               |            | 4556  |
|                               |            | 47595 |
|                               |            | 63561 |
| <i>Rhodiola kirilowii</i>     | PS1904MT02 | CTCGA |
| <i>Rhodiola kirilowii</i>     | PS1904MT03 | ..... |
| <i>Rhodiola kirilowii</i>     | PS1904MT04 | ..... |
| <i>Rhodiola kirilowii</i>     | PS1904MT05 | ..... |
| <i>Rhodiola kirilowii</i>     | PS1904MT06 | ..... |
| <i>Rhodiola quadrifida</i>    | PS1906MT01 | ..... |
| <i>Rhodiola quadrifida</i>    | PS1906MT04 | ..... |
| <i>Rhodiola quadrifida</i>    | PS1906MT07 | ..... |
| <i>Rhodiola gelida</i>        | PS1903MT02 | ..... |
| <i>Rhodiola crenulata</i>     | YC0141MT08 | ..... |
| <i>Rhodiola crenulata</i>     | YC0141MT09 | ..... |
| <i>Rhodiola pamiro-alaica</i> | PS1905MT01 | ..... |
| <i>Rhodiola pamiro-alaica</i> | PS1905MT02 | ..... |
| <i>Rhodiola rosea</i>         | PS1750MT11 | .C... |
| <i>Rhodiola rosea</i>         | PS1750MT12 | ..... |
| <i>Rhodiola rosea</i>         | PS1750MT13 | .C... |
| <i>Rhodiola algida</i>        | PS1901MT01 | ..T.. |
| <i>Rhodiola sacra</i>         | PS1907MT01 | A.TTC |
| <i>Rhodiola sacra</i>         | PS1907MT02 | A.TTC |

**Figure S3** Variable sites of all the *rbcL* sequences in the test.

|                               |            |                                       |
|-------------------------------|------------|---------------------------------------|
|                               |            | 1122 2333344455 5555666667 777        |
|                               |            | 1779991937 9336715600 2599366781 134  |
|                               |            | 2061491127 6561639705 7823657653 705  |
| <i>Rhodiola quadrifida</i>    | PS1906MT01 | TTACGCGAGC GCCAGGGGGG AACTGTAAGC TCG  |
| <i>Rhodiola quadrifida</i>    | PS1906MT04 | .....G.. ..T..... .....               |
| <i>Rhodiola quadrifida</i>    | PS1906MT07 | ..... .....                           |
| <i>Rhodiola gelida</i>        | PS1903MT02 | C.GA..... T..... ..C...T.. ...        |
| <i>Rhodiola pamiro-alaica</i> | PS1905MT01 | ..GA..... T T..... A.. .G....GT.. ... |
| <i>Rhodiola algida</i>        | PS1901MT01 | .AGA.AC.T. TA..A..... ..T.. ...       |
| <i>Rhodiola crenulata</i>     | YC0141MT08 | ..GA..... T T..... ..A..... C..       |
| <i>Rhodiola rosea</i>         | PS1750MT11 | ..G..... T..... A. C.A...T.. ...      |
| <i>Rhodiola rosea</i>         | PS1750MT12 | ..G..... T..... ..A...T.. ...         |
| <i>Rhodiola rosea</i>         | PS1750MT13 | ..G.A..... T..... A. C.A...T.. ...    |
| <i>Rhodiola kirilowii</i>     | PS1904MT03 | ..G..... T...T... ..T... ..           |
| <i>Rhodiola kirilowii</i>     | PS1904MT02 | ..G..... T...T... ..T... ..           |
| <i>Rhodiola kirilowii</i>     | PS1904MT04 | ..G..... T....A... ..A..T..           |
| <i>Rhodiola kirilowii</i>     | PS1904MT05 | ..G..... T..... ..A...T.. ...         |
| <i>Rhodiola kirilowii</i>     | PS1904MT06 | ..G..... T..... ..TA..T..             |
| <i>Rhodiola sacra</i>         | PS1907MT01 | .AG...C... T..GA..... ..G.T.. ..A     |
| <i>Rhodiola sacra</i>         | PS1907MT02 | .AG...C... T..GA....T.....G.T.. ..A   |

**Figure S4** Variable sites of all the *matK* sequences in the test.

```

11 1111111111 1122222222 2222222222 2222223333 33
467789900 0001224688 9900133444 5567788888 8889990000 13
5094590536 7892256513 4623608289 1983502356 7890241378 50
Rhodiola algida PS1901MT01 CCCCGACGCG AAAGCGAGAA CATGTAAGCC GTTT-----GT--G
Rhodiola crenulata PS0576MT11 ...T..A..T TTC..T..C..CCT....T....C-----AAGA--
Rhodiola crenulata YC0141MT08 .....A..T TTC..T..C..TCCT....T....CTTAAT ATAT--GATC G.
Rhodiola crenulata YC0141MT09 .....A.....T..C..CCTC....T....CAATTC TATAAAGATC G.
Rhodiola fastigiata PS1902MT01 T...TGA.....TT.C..CT..T..T....-----AAGA--
Rhodiola fastigiata PS1902MT02 .....A..T TTC..T..C..CT....T....C-----AATATA G.
Rhodiola fastigiata PS1902MT03 .....A..T TTC..T..C..CT....T....C-----AATATA G.
Rhodiola fastigiata PS1902MT04 .....A..T TTC..T..C..CT....T....A-----AATATA G.
Rhodiola gelida PS1903MT02 .....A..T TTC..T..TC. ....T....T..A.ATTAAT ATATAATATC G.
Rhodiola kirilowii PS1904MT02 .....AA..T TTC..T..C..AT....T A..AA-----AAGATC G.
Rhodiola kirilowii PS1904MT03 .....AA..T TTC..T..C..AT....T A..AA-----AAGATC G.
Rhodiola kirilowii PS1904MT04 .....A..T TTC..T..C..CT....G A..A-----AAGATC T.
Rhodiola kirilowii PS1904MT05 ..T...A..T TTC..T..C..CT....T A..A A-----AA-ATC G.
Rhodiola kirilowii PS1904MT06 ...T..A.....T..CC..AT.G..TG A..C-----AATATA G.
Rhodiola pamiro-alaica PS1905MT01 ...T..A..T TTC..T..C..CCT....T....A-----AAGATC G.
Rhodiola pamiro-alaica PS1905MT02 .....A..T TTC..T..TC. ....T....T..A.ATTAAT AT--TATC G.
Rhodiola quadrifida PS1906MT01 .....A.....T..CC..CT....T....A-----A.TTC G.
Rhodiola quadrifida PS1906MT04 .....A..T TTC..T..CC..CT....T....A--TT TATAAA--TC G.
Rhodiola quadrifida PS1906MT07 .....A.....T..CC..CT....T....A-----A.TTC G.
Rhodiola rosea PS1750MT11 ..T...A..TT TTC..T..C..CT....T A..A A--TT TATAAAGATC G.
Rhodiola rosea PS1750MT12 ..T...A..T...A..T..C..CT....T A..A A--TT TATAAAGATC G.
Rhodiola rosea PS1750MT13 ..T...A..TT TTC..T..C..CT....T A..A A--TT TATAAAGATC G.
Rhodiola sacra PS1907MT01 .....A.....TT..CC..AT...A...G...-----..--A
Rhodiola sacra PS1907MT02 .....A.....TT..C..AT...A...-----..--A
Rhodiola serrata PS1908MT01 T...GA.....TT.C..CT..T..T....-----AAGACA G.

```

**Figure S5** Variable sites of all the *psbA-trnH* sequences in the test.
